# Supplementary material for: Decomposition of nitric oxide by rhodium cluster cations at high temperatures
Source: Royal Society of Chemistry journal article supplement (doi:10.1039/d1cp04633k), 2021-01-01
Supplement: d1cp04633k1.pdf [file d1cp04633k1.pdf]

## Electronic Supplementary Information

### Decomposition of Nitric Oxide by Rhodium Cluster Cations at High Temperatures

*Toshiaki Nagata, Kimihiro Kawada, Xuemei Chen, Masato Yamaguchi, Ken Miyajima,  
Fumitaka Mafuné\**

Department of Basic Science, School of Arts and Sciences, The University of Tokyo, Komaba,  
Meguro, Tokyo 153-8902, Japan.

#### Contents

1. Distribution maps of  $\text{Rh}_{6-9}\text{N}_x\text{O}_y^+$  after reaction with NO
2. Relative intensities of  $\text{Rh}_{6,9}\text{N}_x\text{O}_y^+$  as functions of temperature
3. Atomic coordinates for optimized structures
4. Complete author list for ref 16

### 1. Distribution maps of $\text{Rh}_{6-9}\text{N}_x\text{O}_y^+$ after reaction with NO

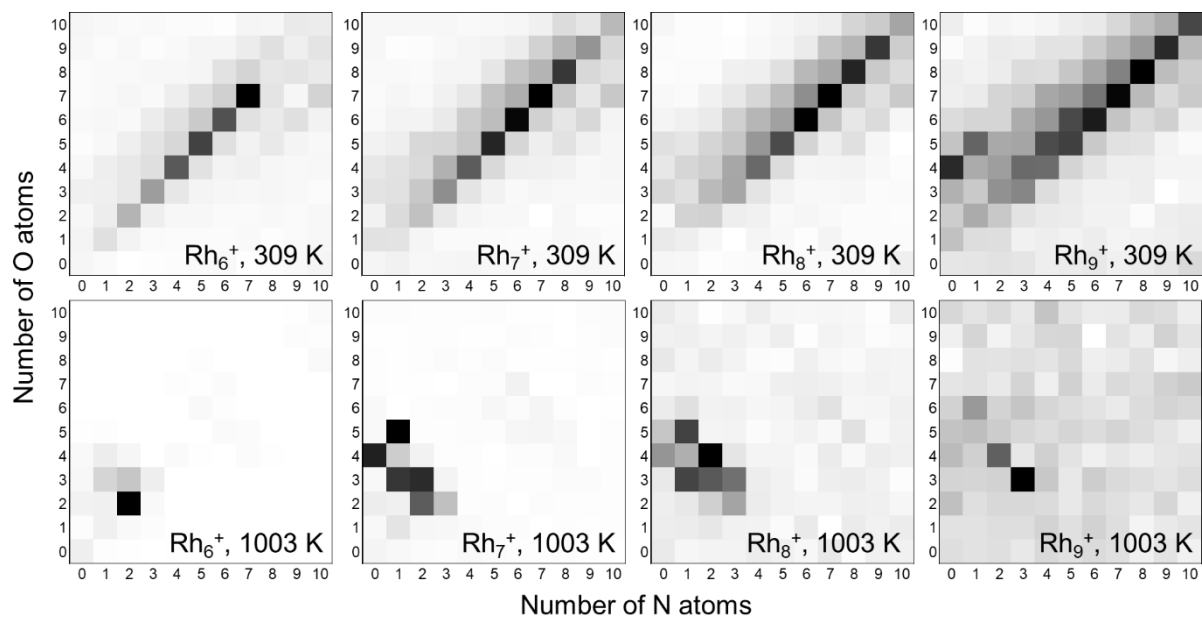

**Figure S1.** Ion intensity distribution maps of  $\text{Rh}_{6-9}\text{N}_x\text{O}_y^+$  after reaction with NO at 309 K and those after heating to 1003 K. Note that although the map of  $\text{Rh}_9^+$  at 309 K shows intense existence of  $\text{Rh}_9\text{O}_4^+$  and  $\text{Rh}_9\text{NO}_5^+$ , these are not real signals but are contributed by other compositions that have  $m/z$  close to theirs, e.g.,  $\text{Rh}_7\text{N}_9\text{O}_9^+$  ( $m/z = 990.3$ ) contributes to  $\text{Rh}_9\text{O}_4^+$  ( $m/z = 990.1$ ). Such misassigned signals have been removed in the temperature dependence figures.

## 2. Relative intensities of $\text{Rh}_{6,9}\text{N}_x\text{O}_y^+$ as functions of temperature

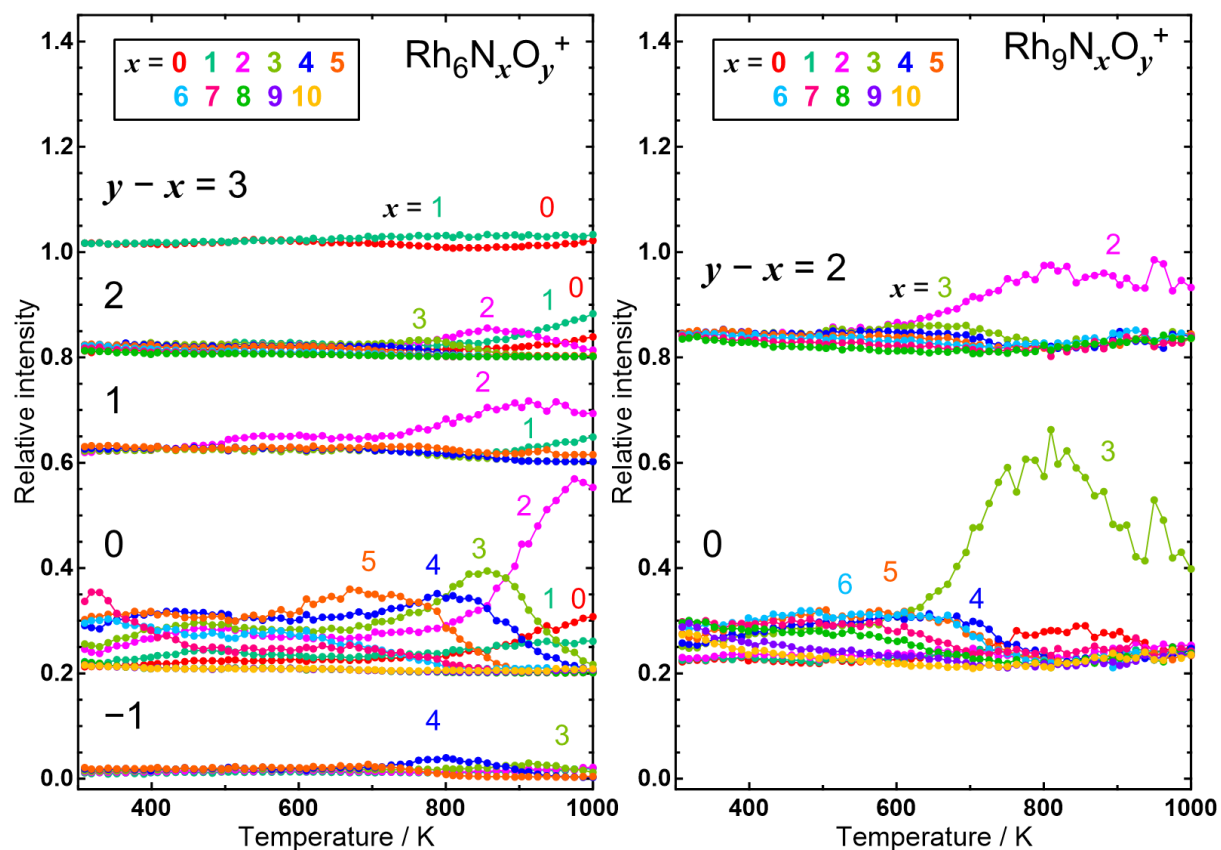

**Figure S2.** Relative intensities of  $\text{Rh}_{6,9}\text{N}_x\text{O}_y^+$  after reaction with NO at 309 K, followed by heating as function of the heating temperature. The plots are vertically offset based on  $y - x$  values for clarity. The intensity of  $\text{Rh}_6\text{NO}_2^+$  ( $m/z = 663.4$ ) is not evaluated below 800 K because it is considered low enough and the evaluation is disturbed by a strong signal of  $\text{Rh}_5\text{N}_5\text{O}_5^+$  ( $m/z = 664.5$ ).

### 3. Atomic coordinates for optimized structures

Coordinates are shown in angstrom.

$\text{Rh}_8\text{N}_3\text{O}_3^+$  (quintet)

|    | x         | y         | z         |
|----|-----------|-----------|-----------|
| Rh | 2.196841  | -0.400193 | 1.437375  |
| Rh | -0.488896 | 0.126401  | -1.490993 |
| Rh | -0.882555 | 0.011231  | 1.636104  |
| Rh | 2.633036  | -0.119895 | -1.281770 |
| Rh | 1.047818  | 1.894860  | 0.049978  |
| Rh | 0.260889  | -1.942862 | 0.117018  |
| Rh | -2.062932 | 1.720967  | -0.024476 |
| Rh | -2.408007 | -1.406166 | -0.305636 |
| N  | 2.030348  | -1.474506 | -0.121659 |
| O  | -0.648289 | 2.929033  | 0.083352  |
| N  | 0.769104  | 0.809423  | 1.599285  |
| O  | -1.256789 | -2.828604 | -0.625600 |
| N  | 1.190428  | 0.985588  | -1.594171 |
| O  | -3.252162 | 0.269699  | -0.129778 |

$\text{Rh}_8\text{N}_2\text{O}_2^+$  (dectet)

|    | x         | y         | z         |
|----|-----------|-----------|-----------|
| Rh | -2.294982 | 0.452199  | -1.335940 |
| Rh | 2.597807  | 0.172818  | -0.597190 |
| Rh | -1.660907 | -1.157619 | 0.791443  |
| Rh | 0.117270  | 1.364129  | -0.721873 |
| Rh | -0.281861 | -1.119987 | -1.475807 |
| Rh | -1.875940 | 1.471826  | 1.048402  |
| Rh | 0.864312  | -2.042036 | 0.698372  |
| Rh | 1.042288  | 0.399740  | 1.591279  |
| N  | 3.574000  | 1.578058  | -0.304606 |
| O  | 1.682861  | -1.476813 | -1.114407 |
| N  | -0.749991 | 0.197497  | 1.765736  |
| O  | 4.238702  | 2.504683  | -0.156687 |

| Rh <sub>8</sub> NO <sub>3</sub> <sup>+</sup> (septet) |           |           |           |
|-------------------------------------------------------|-----------|-----------|-----------|
|                                                       | x         | y         | z         |
| Rh                                                    | -2.344210 | -0.048757 | 1.333266  |
| Rh                                                    | 0.365466  | 0.040704  | -1.303366 |
| Rh                                                    | 0.364914  | 0.040967  | 1.303825  |
| Rh                                                    | -2.343690 | -0.048839 | -1.333900 |
| Rh                                                    | -0.963937 | -1.834485 | 0.000129  |
| Rh                                                    | -0.476542 | 2.224884  | 0.000074  |
| Rh                                                    | 2.209438  | -1.699436 | 0.000150  |
| Rh                                                    | 2.503012  | 1.218804  | -0.000153 |
| N                                                     | -1.975237 | 1.187021  | -0.000298 |
| O                                                     | 0.682972  | -2.775189 | 0.000185  |
| O                                                     | 1.394707  | 2.705214  | 0.000280  |
| O                                                     | 3.506872  | -0.371517 | -0.000341 |

#### 4. Complete author list for ref 16

Frisch, M. J.; Trucks, G. W.; Schlegel, H. B.; Scuseria, G. E.; Robb, M. A.; Cheeseman, J. R.; Scalmani, G.; Barone, V.; Mennucci, B.; Petersson, G. A.; Nakatsuji, H.; Caricato, M.; Li, X.; Hratchian, H. P.; Izmaylov, A. F.; Bloino, J.; Zheng, G.; Sonnenberg, J. L.; Hada, M.; Ehara, M.; Toyota, K.; Fukuda, R.; Hasegawa, J.; Ishida, M.; Nakajima, T.; Honda, Y.; Kitao, O.; Nakai, H.; Vreven, T.; Montgomery, J. A., Jr.; Peralta, J. E.; Ogliaro, F.; Bearpark, M.; Heyd, J. J.; Brothers, E.; Kudin, K. N.; Staroverov, V. N.; Keith, T.; Kobayashi, R.; Normand, J.; Raghavachari, K.; Rendell, A.; Burant, J. C.; Iyengar, S. S.; Tomasi, J.; Cossi, M.; Rega, N.; Millam, J. M.; Klene, M.; Knox, J. E.; Cross, J. B.; Bakken, V.; Adamo, C.; Jaramillo, J.; Gomperts, R.; Stratmann, R. E.; Yazyev, O.; Austin, A. J.; Cammi, R.; Pomelli, C.; Ochterski, J. W.; Martin, R. L.; Morokuma, K.; Zakrzewski, V. G.; Voth, G. A.; Salvador, P.; Dannenberg, J. J.; Dapprich, S.; Daniels, A. D.; Farkas, Ö.; Foresman, J. B.; Ortiz, J. V.; Cioslowski, J.; Fox, D. J.; *Gaussian 09*, Revision E.01; Gaussian, Inc., Wallingford CT, 2013.
